# Supplementary material
Source: PubMed Central journal article supplement (PMC8651829)
Supplement: NIHMS1710136-supplement-supinfo.pdf [file NIHMS1710136-supplement-supinfo.pdf]

## Supplementary Materials for

### **IRE1 $\alpha$ -mediated monounsaturated fatty acid synthesis drives B cell differentiation and lupus-like autoimmune disease**

Yana Zhang<sup>1,2\*</sup>, Ming Gui<sup>3</sup>, Yajun Wang<sup>2</sup>, Nikita Mani<sup>2</sup>, Shuvam Chaudhuri<sup>2</sup>, Beixue Gao<sup>2</sup>, Huabin Li<sup>4</sup>,  
Yashpal S. Kanwar<sup>2</sup>, Sarah A. Lewis<sup>5</sup>, Sabrina N. Dumas<sup>6</sup>, James M. Ntambi<sup>5,6</sup>, Kezhong Zhang<sup>7</sup> and Deyu  
Fang<sup>2\*</sup>

#### **This PDF file includes:**

Supplemental Material & Methods

Supplemental Figures 1-6 and legends

Supplemental Table 1 & 2

## Supplemental Material & Methods

**Reagents.** Murine recombinant IL-4 were purchased for Peprotech (Cat#: 214-14). LPS (Cat#: L4391), OA (Cat#: O3008), Sodium palmitate (Cat#: P9767), fatty acid-free BSA (Cat#: A8806) were purchased from Sigma-Aldrich. IRE1 endonuclease inhibitor BI09 (Cat#: No.6009) was from EOCRIS, anti-CD40 (Cat#: 16-0401-86) was from Thermo Fisher, SCDi (Cat#: Cay10012562) was purchased from Cayman.

**Primary B cell isolation and culture.** Primary B cells were negatively isolated from spleen of 4-6 weeks old *Ire1<sup>fl/fl</sup>* and *CD19-Cre/Ire1<sup>fl/fl</sup>/MRL.Fas<sup>lpr</sup>* mice using Dynabeads Mouse CD43 (ThermoFisher Scientific, Cat#: 11422D). Purified B cells were activated with LPS (1 $\mu$ g/ml; Sigma, Cat#: L4391), anti-CD40 (4 $\mu$ g/ml; eBioscience, Cat#: 16-0401-86), and IL-4 (40ng/ml; Peprotech, Cat#: 214-14) as indicated for 3-5d, then cell apoptosis was detected by Annexin V and PI staining according to the manufacturer's instructions.

**Standard Flow Cytometry and Lipid Staining.** Single-cell suspensions were incubated with fixable viability dye. Surface staining was performed in ice-cold PBS with 3% FBS in the presence of FcR blocking Ab CD16/32. All abs and reagents used for FACS are listed in the Supplemental supplementary Table 2. Intracellular lipid content was evaluated by flow cytometry using 4,4 Difluoro1,3,5,7,8-Pentamethyl-4-Bora-3a,4a-Diaza-s-Indacene (BODIPY493/503; ThermoFisher, Cat#: D3922) as previously described[1]. Following surface marker staining using antibodies, B cells were stained with 200  $\mu$ l of BODIPY493/503 for 15 min at 37°C. BODIPY493/503 staining was detected in the FITC channel. Intracellular staining was performed using the Invitrogen Fixation/Permeabilization Concentrate and Diluent (ThermoFisher, Cat#: 00-5521-00) and Permeabilization buffers (ThermoFisher, Cat#: 00-8333-56). Cells were analyzed on a FACSCanto II instrument (BD Biosciences).

**RNA isolation and quantitative real-time RT-PCR.** Total RAN was extracted with RNAeasy Mini Kit (QIAGEN, Cat#: 74106), and cDNA was synthesized using the cDNA synthesis kit (qScript™ cDNA Synthesis Kit, Quanta, Cat#: 95047-500). SYBR Green fluorescent reagent (PerfeCTa SYBR Green FastMix for iQ, Quanta, Cat#: 95071-012) was used for quantitative real-time RT-PCR. The relative amount of mRNA was calculated by the comparative threshold cycle method with  $\beta$ -actin as an inter-control. All samples were run on a Bio-Rad MyiQ™2 instrument. Primer sequences are shown in the supplementary Table 1.

**Genome-wide RNA-sequencing.** Primary naïve B cells from spleen of 4-5 weeks old *Irela<sup>fl/fl</sup>* and CD19-Cre *Irela<sup>fl/fl</sup>* MRL.Fas<sup>lpr</sup> mice were isolated by CD43<sup>-</sup> untouched B cell beads.  $1 \times 10^6$  purified B cells were stimulated with LPS (1  $\mu$ g/ml). Then CD3<sup>-</sup>B220<sup>int</sup>CD138<sup>hi</sup> plasma cells and CD3<sup>-</sup>B220<sup>+</sup>CD138<sup>-</sup> activated B cells were sorted on a FACSMelody Cell Sorter (BD Biosciences) as described [2, 3]. RNA was extracted with RNAeasy Mini Kit (QIAGEN, cat#: 74106) following manufacturer's instructions and sent to NUseq Core (Northwestern University) for RNA-seq analysis. Differential expression was determined using DESeq2. The cutoff determining significantly differentially expressed genes was an FDR-adjusted p value less than 0.05.

**Assessment of clinical disease.** Survival was assessed in *Irela<sup>fl/fl</sup>* and CD19-Cre-*Irela<sup>fl/fl</sup>* MRL.Fas<sup>lpr</sup> mice that died of disease spontaneously and those sacrificed due to general debility. Proteinuria and dermatitis were detected and scored as previously described [4]. For histopathology analysis, paraffin embedded, formalin-fixed tissue sections, stained with hematoxylin and eosin (H&E) as well as Periodic acid-Schiff (PAS), and were scored for both glomerular and interstitial nephritis by a pathologist in a double-blinded manner. Formalin-fixed and paraffin-embedded sections from lung and liver, stained with H&E, were scored by cellular interstitial pneumonia and hepatitis from 0-6 (0, none; 6, severe) as described previously [4]. IgG1 immune deposits were determined by direct immunofluorescence on 7  $\mu$ M OCT-embedded frozen kidney tissue sections using monoclonal rat anti- IgG1 FITC-conjugated (BD, Cat#: 553443) antibody with 1:100

dilution as reported [5]. IgG immune complexes were measured by indirect immunofluorescence as previously described [4]. Images were captured and analyzed on a zeiss microscope with the ZEN software.

**Immunoblot analysis.** B cells were then lysed with RIPA lysis buffer (Millipore, Cat#: 20-188) added with protease inhibitor cocktail. Total cell extracts were separated in 10% SDS-PAGE gels and electro-transferred onto polyvinylidene difluoride membranes (Bio-Rad, Cat#: 1620177). Membranes were probed with the appropriate primary antibodies, including IRE1 $\alpha$  (Abcam, Cat#: ab37073) and GAPDH (Abcam, Cat#: ab181602). After washing twice with TBST, membranes were incubated with HRP-conjugated secondary antibodies. Membranes were then washed and visualized with an ECL detection system (Bio-Rad).

## References

1. Qiu, B. and M.C. Simon, *BODIPY 493/503 Staining of Neutral Lipid Droplets for Microscopy and Quantification by Flow Cytometry*. Bio Protoc, 2016. **6**(17).
2. Kong, S., et al., *Deleted in Breast Cancer 1 Suppresses B Cell Activation through RelB and Is Regulated by IKK $\alpha$  Phosphorylation*. J Immunol, 2015. **195**(8): p. 3685-93.
3. Kong, S., et al., *DBCI is a suppressor of B cell activation by negatively regulating alternative NF- $\kappa$ B transcriptional activity*. J Immunol, 2014. **193**(11): p. 5515-24.
4. Teichmann, L.L., et al., *Dendritic cells in lupus are not required for activation of T and B cells but promote their expansion, resulting in tissue damage*. Immunity, 2010. **33**(6): p. 967-78.
5. Zhang, J., et al., *The type III histone deacetylase Sirt1 is essential for maintenance of T cell tolerance in mice*. J Clin Invest, 2009. **119**(10): p. 3048-58.

## Supplemental Figures and legends

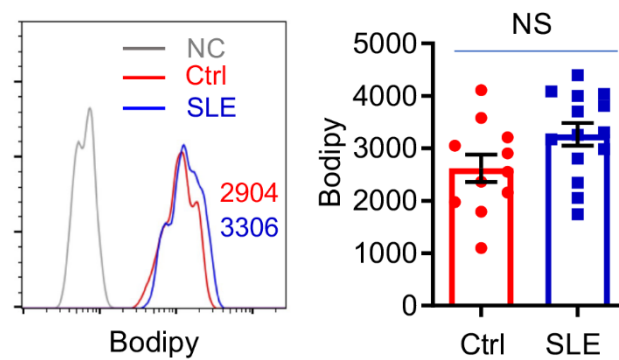

**Supplemental Fig. 1. Analysis of lipid volume in T cells from lupus patients.** Intracellular lipid content in CD3 $\epsilon^+$  T cell populations. (Left) Representative flow cytometric profile of lipid staining for T cells from patients with active SLE and healthy controls. (Right) Lipid quantification expressed as mean fluorescence intensity (MFI) of Bodipy 493/503 staining. Data are shown as mean  $\pm$  SD. Student's *t* test (two-tailed) was used for statistical analysis. NS: not significant.

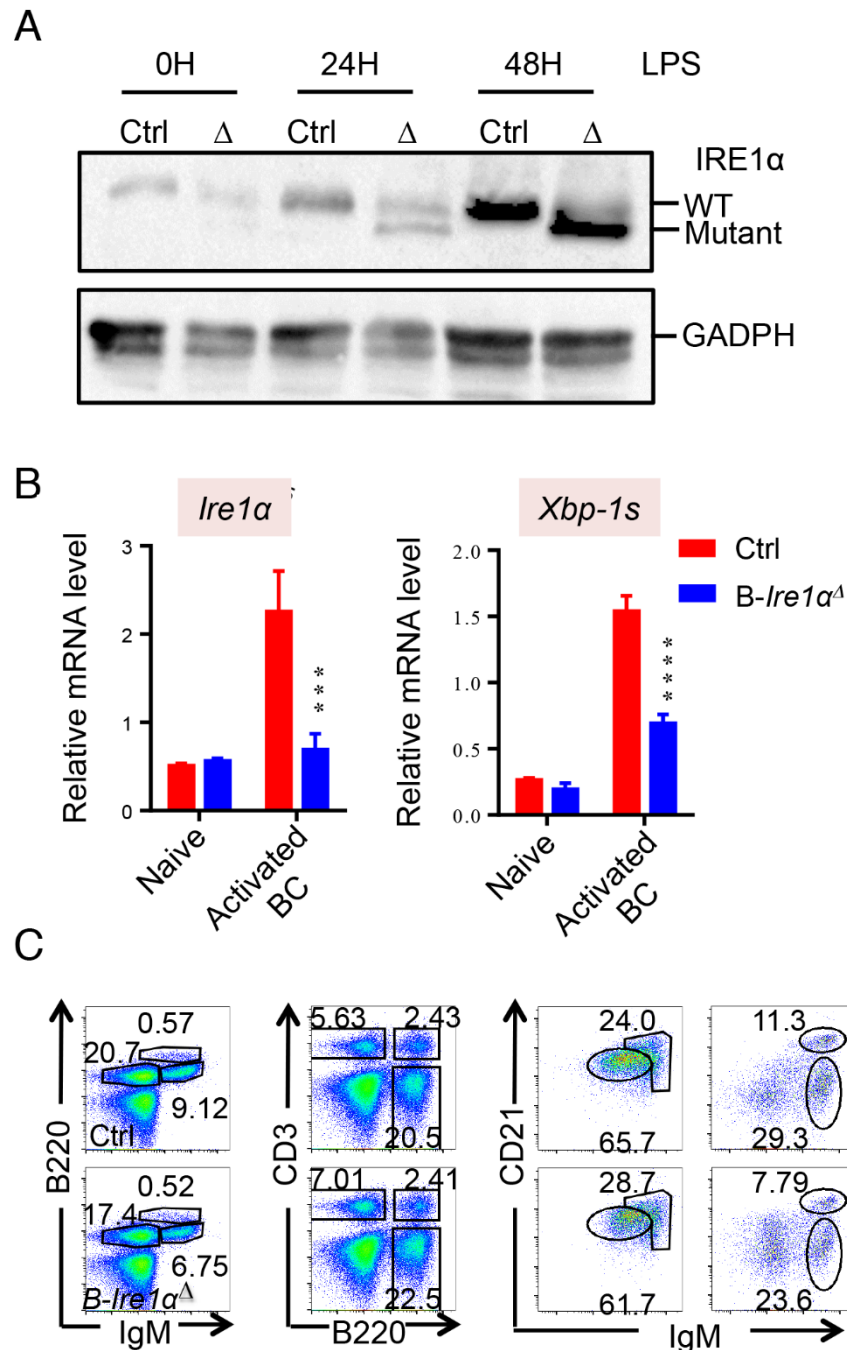

**Supplemental Fig. 2. Characterization of *Ire1α* gene deletion in B cells.** (A-B) Naïve B cells (B220<sup>+</sup>CD43<sup>-</sup>) from the spleens of *Ire1α* conditional knockout (*Cd19-Ire1αΔ*) mice and their littermate controls were sorted, and stimulated with LPS (1μg/ml) for indicated time points *in vitro*. (A) IRE1α protein expression levels were analyzed by western blotting (top panel) using GADPH as a loading control (bottom panel). (B) The mRNA levels of *Ire1α* and *Xbp-1s* in B cell from MRL.Fas<sup>lpr</sup> SLE mice and *Cd19-Ire1αΔ* mice were determined by RT-qPCR. (C) Bone marrow isolated from MRL.Fas<sup>lpr</sup> SLE mice and *Cd19-Ire1αΔ* mice was analyzed. Representative FACS profiles of B220<sup>lo</sup>IgM<sup>-</sup> pro-B cells and pre-B, B220<sup>lo</sup>IgM<sup>+</sup> immature-B cells, and B220<sup>hi</sup>IgM<sup>+</sup> mature-B cells were shown. (D) B220<sup>+</sup> cells from spleen of MRL.Fas<sup>lpr</sup> SLE mice and *Cd19-Ire1αΔ* mice were analyzed for CD23<sup>+</sup>CD21<sup>int</sup>IgM<sup>int</sup> mature B cells and CD23<sup>+</sup>CD21<sup>hi</sup>IgM<sup>hi</sup> T2 B cells and CD23<sup>-</sup>CD21<sup>lo</sup>IgM<sup>+</sup> T1 and CD23<sup>-</sup>CD21<sup>hi</sup>IgM<sup>+</sup> marginal zone (MZ) B cells. (E) Splenocytes from *Cd19-Ire1αΔ* mice and their littermate controls were analyzed for CD3ε<sup>+</sup> T cells and B220<sup>+</sup> B cells. Statistical differences were tested using an unpaired Student's *t*-test (two-tailed). \*\*\* *p*<0.001, \*\*\*\* *p*<0.0001. *Xbp-1s*, spliced *Xbp-1*.

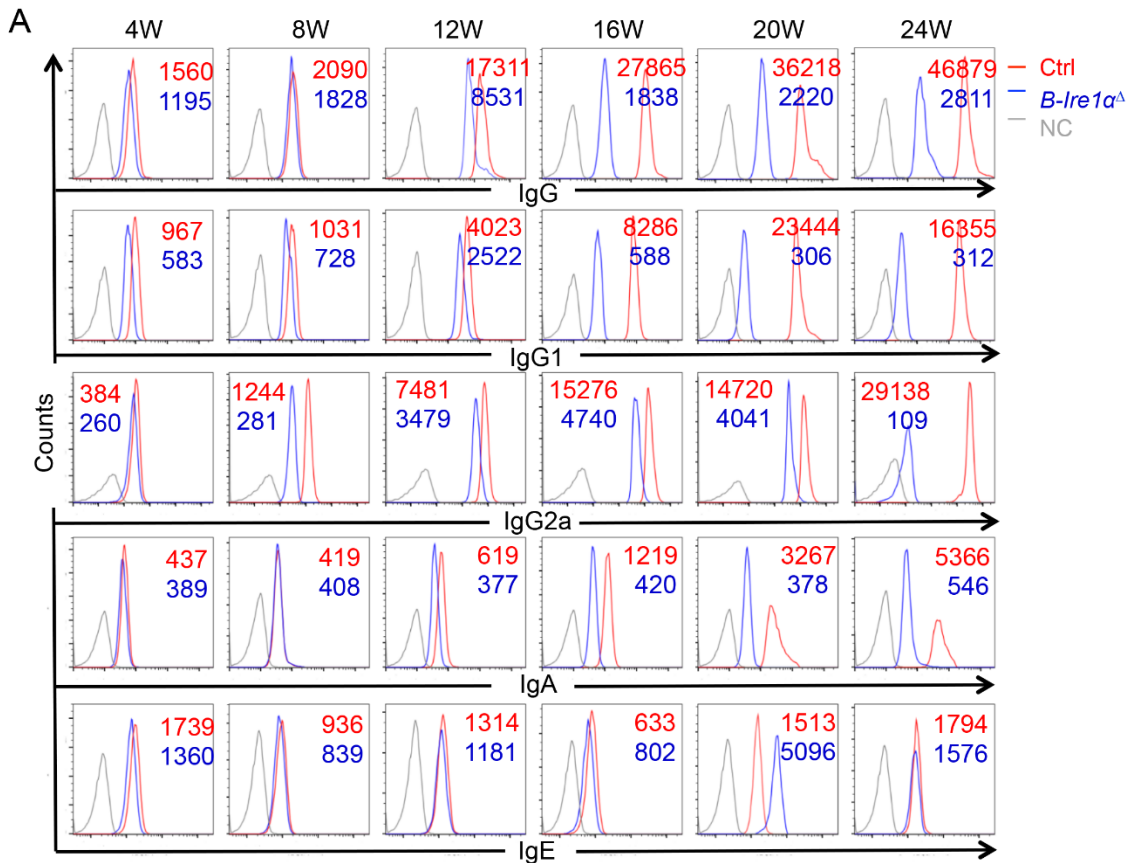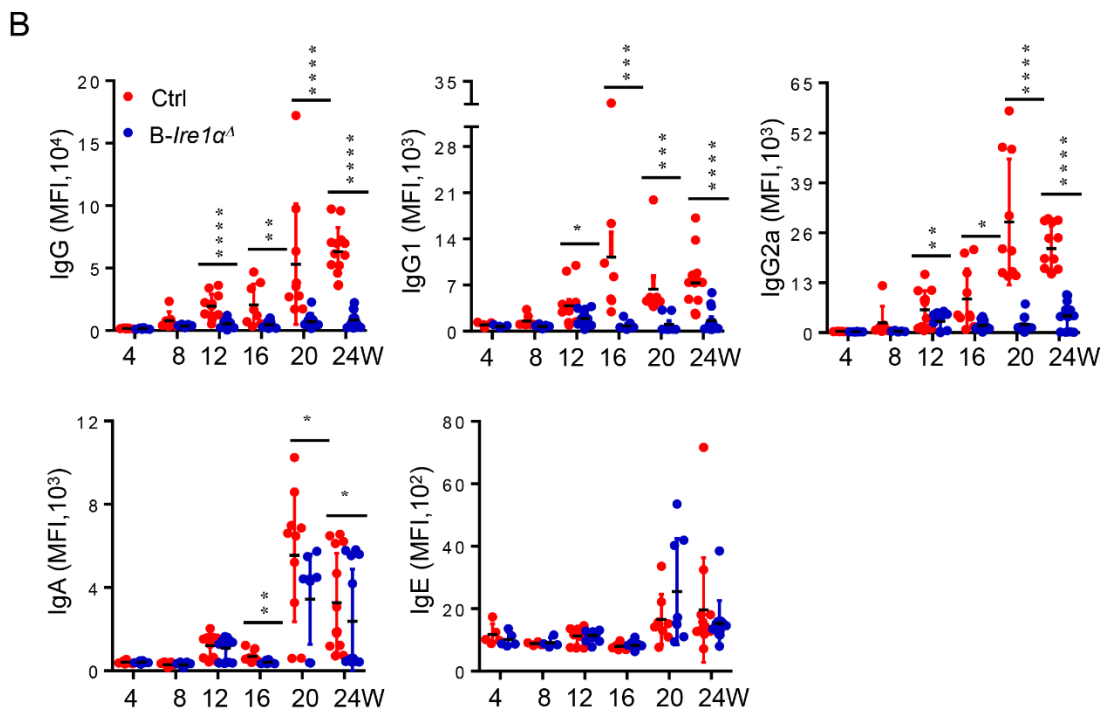

**Supplemental Fig. 3. Auto-Ab generation is largely impaired in IRE1α -null B cells from fas mutant lupus mice.** (A) Representative flow cytometric profiles of different subclasses of Auto-Ab from the sera of indicated age- *Cd19- Ire1α*<sup>Δ</sup> lupus mice and their littermate control mice using EL4 murine T lymphoma cell line. (B) Intracellular Auto-Ab quantification expressed as mean fluorescence intensity (MFI) of IgG (1:32000), IgG1(1:100), IgG2a (1:1600), IgA (1:1600), or IgE (1:100). Data are shown as mean ± SD. Statistical differences in were tested using an unpaired Student's *t*-test (two-tailed). \* *p*<0.05, \*\* *p*<0.01, \*\*\* *p*<0.001, and \*\*\*\* *p*<0.0001.

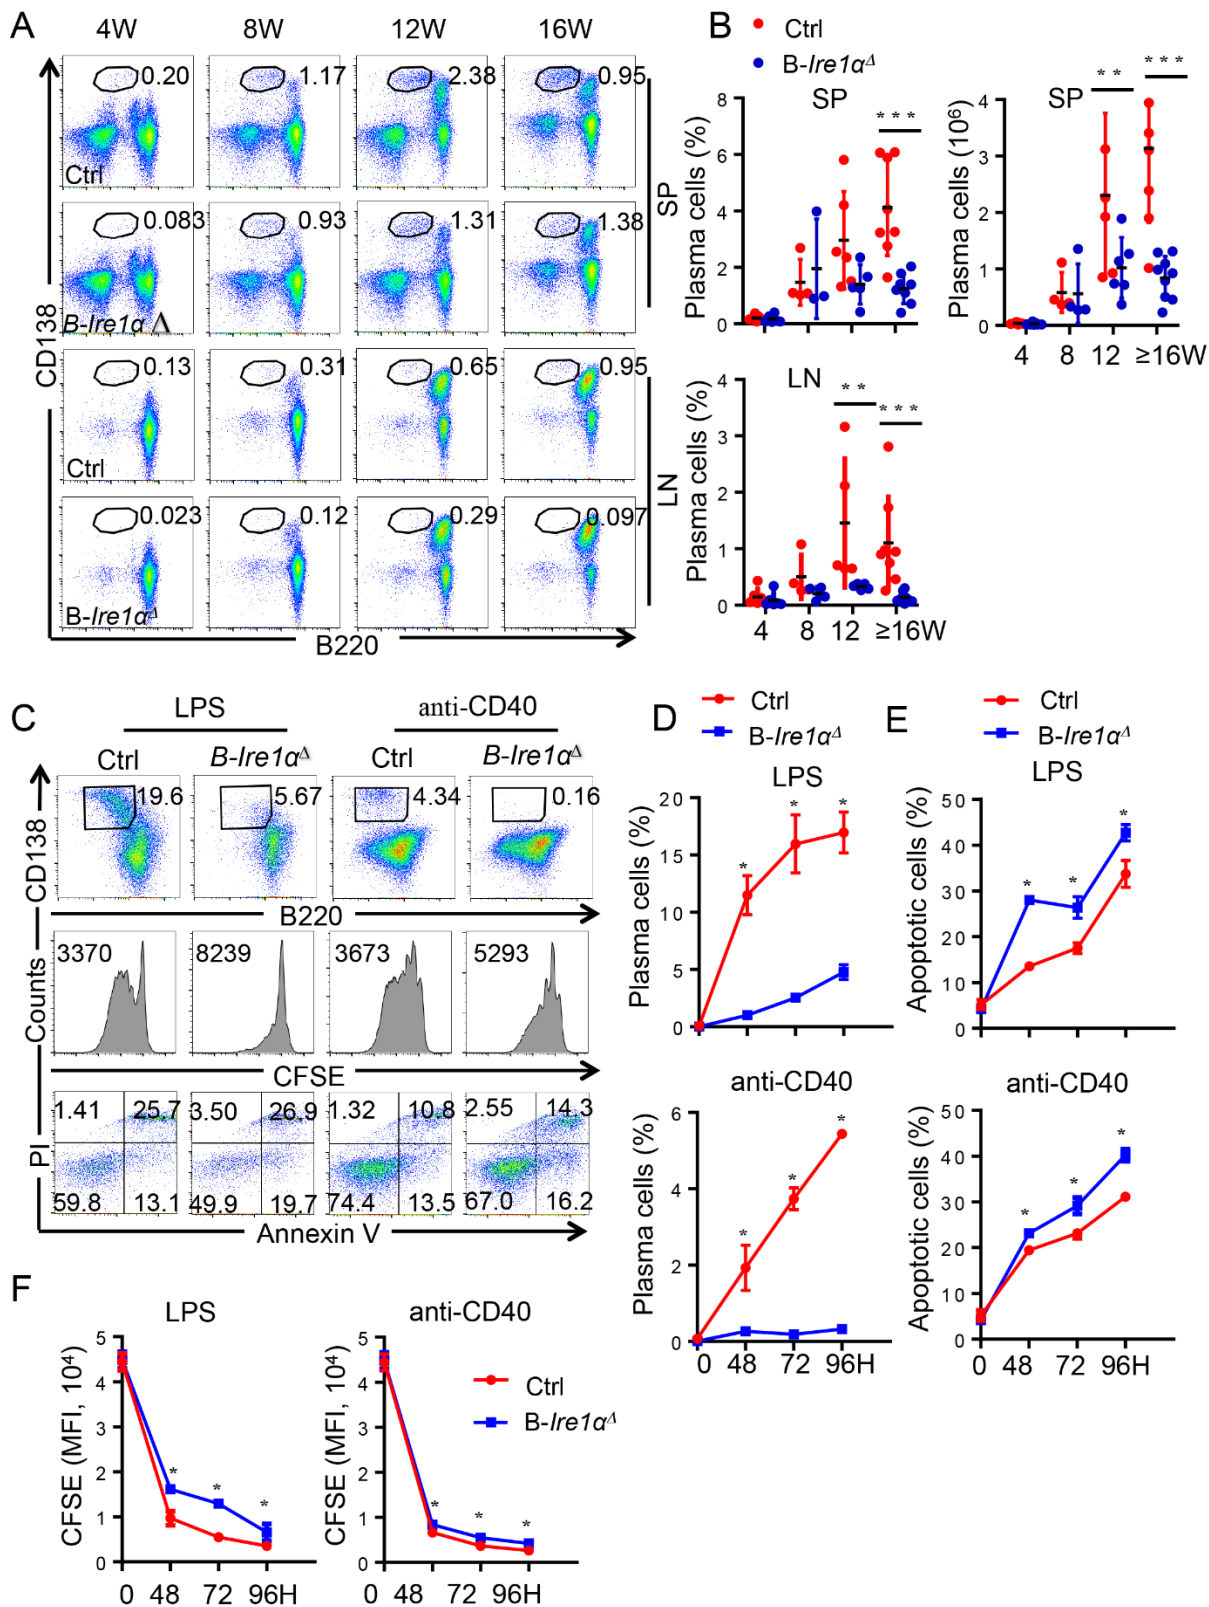

**Supplemental Fig. 4. B cell-specific IRE1 $\alpha$  expression is responsible for plasma cell differentiation.**

(A-B) Representative flow cytometric profiles (A) and data plots (B) show frequencies and absolute number of CD3<sup>+</sup>B220<sup>low</sup>CD138<sup>+</sup> PCs from splenocytes and lymphocytes from *Cd19-Ire1α<sup>Δ</sup>* lupus mice and their littermate control with indicated ages. (C-F) Naïve (B220<sup>+</sup>CD43<sup>-</sup>) B cells from the splenocytes of *Cd19-Ire1α<sup>Δ</sup>* mice and their littermate controls were sorted, and stimulated with LPS (1  $\mu$ g/ml) or anti-CD40 (4  $\mu$ g/ml) at indicated time points *in vitro*. Representative FACS analysis (C) and data plots (D-F) of differentiation, proliferation, and apoptosis of B cells were analyzed. Significance determined by an unpaired Student's *t*-test (two-tailed). \*  $p < 0.05$ , \*\*  $p < 0.01$ , \*\*\*  $p < 0.001$ .



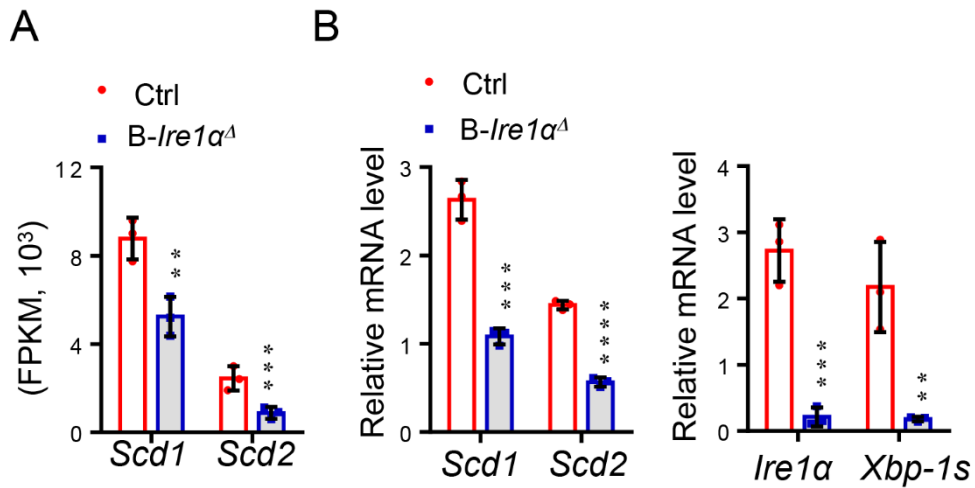

**Supplemental Fig. 5. mRNA expression levels of Scd1 and Scd2 in plasma cells were down-regulated in *Ire1α* – null B cells.** Naïve (B220<sup>+</sup>CD43<sup>-</sup>) B cells from the splenocytes of *Cd19-Ire1αΔ* mice and their littermate controls were isolated, and stimulated with LPS (1μg/ml) for 4 days *in vitro*. **(A)** Sorted B220<sup>+</sup>CD138<sup>-</sup> activated B cells were analyzed by RNA sequencing. mRNA expression levels of Scd1 and Scd2 in B cells from the indicated mice. **(B)** RT-qPCR analysis of expression levels of Scd1, Scd2, *Ire1α* and *Xbp-1s* in *Ire1α*-deficient- and sufficient- B cells. Statistical differences were tested using an unpaired Student's *t*-test (two-tailed). \*\*  $p < 0.01$ , \*\*\*  $p < 0.001$ , and \*\*\*\*  $p < 0.0001$ . Scd1, Stearoyl-CoA desaturase-1; Scd2, Stearoyl-CoA desaturase-2; *Xbp-1s*, spliced *Xbp-1*.

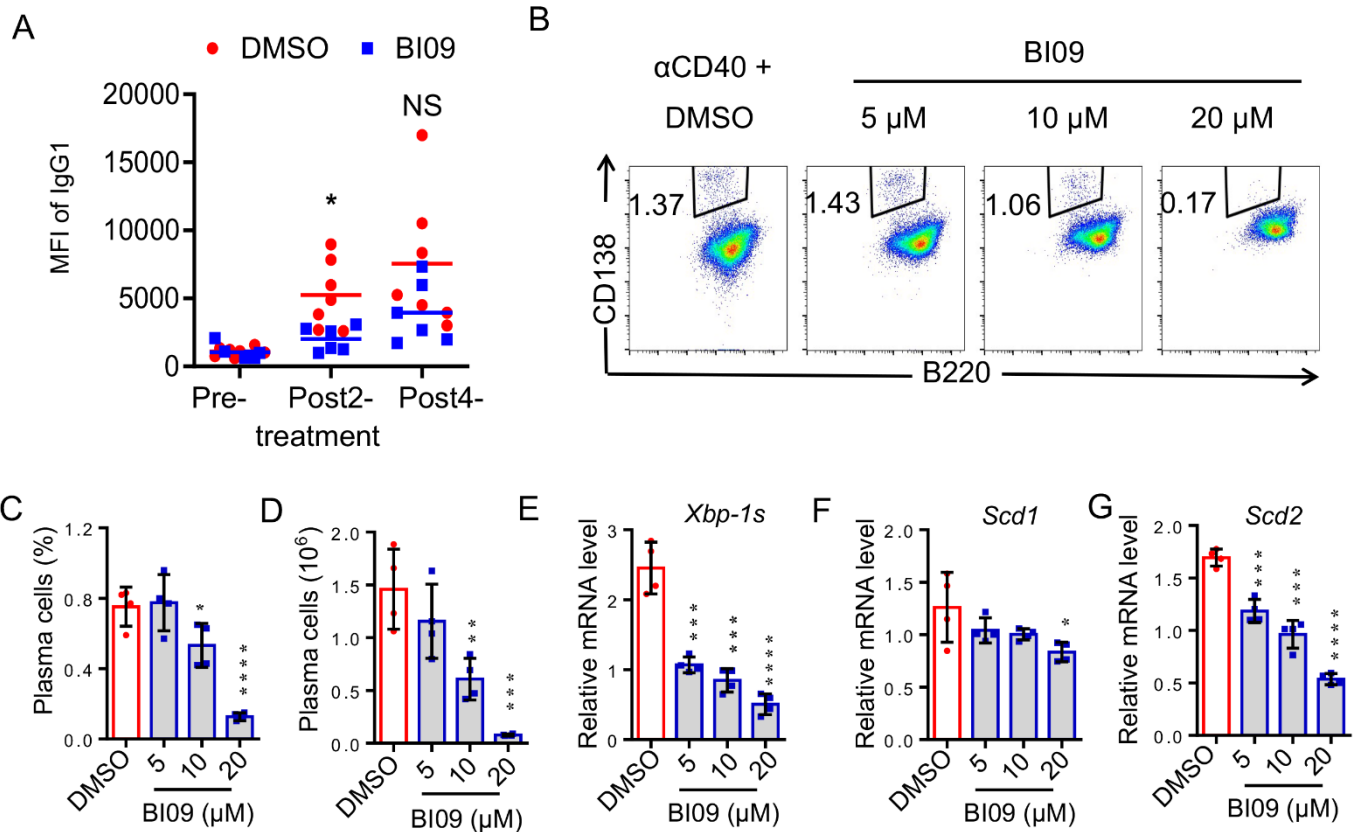

**Supplemental Fig. 6. Effect of BI09 on humoral autoimmunity in vivo and in vitro. (A)** The self-reactive IgG1 levels in sera from MRL/Lpr mice 2 and 4 weeks after the termination of BI09 treatment were analyzed. **(B-G)** Primary naïve (B220<sup>+</sup>CD43<sup>-</sup>) B cell from splenocytes were treated with anti-CD40 (4μg/ml) plus different concentrations of BI09 at indicated time points *in vitro*. Representative flow cytometric profile (B) and data plots of frequencies (C) and cell numbers (D) of plasma cells were shown. Expression levels of XBP-1s (E), SCD1 (F), and SCD2 (G) transcripts were evaluated using RT-qPCR. Significance were tested using an unpaired Student's *t* - test (two-tailed). \*  $p < 0.05$ , \*\*\*  $p < 0.001$ , \*\*\*\*  $p < 0.0001$ . Scd1, Stearoyl-CoA desaturase-1; Scd2, Stearoyl-CoA desaturase-2; Xbp-1s, spliced Xbp-1.

**Supplemental Table 1: Primers used for this study.**

| <b>Species</b> | <b>Primer name</b> | <b>Sequence (5' to 3')</b>     | <b>Purpose</b>                       |
|----------------|--------------------|--------------------------------|--------------------------------------|
| HUMAN          | IRE1 $\alpha$ - F  | TAG TCA GTT CTG CGT CCG CT     | RT-qPCR                              |
|                | IRE1 $\alpha$ - R  | TTC CAA AAA TCC CGA GGC CG     |                                      |
| HUMAN          | XBP-1S - F         | GCT GAG TCC GCA GCA GGT        | RT-qPCR                              |
|                | XBP-1S - R         | ACT GGG TCC AAG TTG TCC AG     |                                      |
| HUMAN          | XBP-1t - F         | GAG TTA AGA CAG CGC TTG GG     | RT-qPCR                              |
|                | XBP-1t - R         | ACT GGG TCC AAG TTG TCC AG     |                                      |
| HUMAN          | SCD1 - F           | TTC CCG ACG TGG CTT TTT CT     | RT-qPCR                              |
|                | SCD1 - R           | AGC CAG GTT TGT AGT ACC TCC    |                                      |
| HUMAN          | SCD2 - F           | CCC TGG TAC ATC TGG GGA GA     | RT-qPCR                              |
|                | SCD2 - R           | GAA GCC TTC ACC AAT GGC AC     |                                      |
| HUMAN          | CHOP - F           | CTG CCT TTC ACC TTG GAG AC     | RT-qPCR                              |
|                | CHOP - R           | CGT TTC CTG GGG ATG AGA TA     |                                      |
| HUMAN          | $\beta$ -ACTIN - F | CTG AGC GTG GCT ACT CCT TC     | RT-qPCR                              |
|                | $\beta$ -ACTIN - R | GGC ATA CAG GTC CTT CCT GA     |                                      |
| Mouse          | $\beta$ -Actin - F | GCT CTG GCT CCT AGC ACC AT     | RT-qPCR                              |
|                | $\beta$ -Actin - R | GCC ACC GAT CCA CAC AGA GT     |                                      |
| Mouse          | Ire1 $\alpha$ - F  | CCC ATC ACC CTG CTT CAT CA     | RT-qPCR                              |
|                | Ire1 $\alpha$ - R  | TGC AGA GGC CAA AGT CAG AG     |                                      |
| Mouse          | Xbp-1s - F         | GAG TCC GCA GCA GGT G          | RT-qPCR                              |
|                | Xbp-1s - R         | GTG TCA GAG TCC ATG GGA        |                                      |
| Mouse          | Scd1 - F           | TTC TTG CGA TAC ACT CTG GTG C  | RT-qPCR                              |
|                | Scd1 - R           | CGG GAT TGA ATG TTC TTG TCG T  |                                      |
| Mouse          | Scd2 - F           | GCA TTT GGG AGC CTT GTA CG     | RT-qPCR                              |
|                | Scd2 - R           | AGC CGT GCC TTG TAT GTT CTG    |                                      |
|                |                    |                                |                                      |
| Mouse          | Ire1 $\alpha$ - F  | CAG AGA TGC TGA GTG AAG AC     | Ire1 $\alpha$ floxed mice genotyping |
|                | Ire1 $\alpha$ - R  | ACA GTG GTT CCT GTG AAG GT     |                                      |
| Mouse          | Cre - F            | GCG GTC TGG CAG TAA AAA CTA    | CD4-Cre TG mice genotyping           |
|                | Cre - R            | GTG AAA CAG CAT TGC TGT CAC TT |                                      |

**Supplemental Table 2: Antibodies and reagents used for the flow cytometry analysis.**

| <b>Species</b> | <b>Fluorescence</b>  | <b>Antigen</b>            | <b>Company</b> | <b>Cat. #</b> |
|----------------|----------------------|---------------------------|----------------|---------------|
| Mouse/ Human   | FITC                 | Annexin V                 | Biolegend      | 640906        |
| Mouse/ Human   | PE                   | Annexin V                 | Biolegend      | 640908        |
| Mouse/ Human   | APC                  | Annexin V                 | Biolegend      | 640920        |
| Mouse/ Human   | FITC                 | B220 (RA3-6B2)            | Biolegend      | 103206        |
| Mouse/ Human   | APC                  | B220 (RA3-6B2)            | Biolegend      | 103212        |
| Mouse/ Human   | Alexa Fluor 488      | B220 (RA3-6B2)            | Biolegend      | 103225        |
| Mouse          | PE                   | CD3 $\epsilon$ (145-2C11) | Biolegend      | 100308        |
| Mouse          | PE/Cyanine7          | CD3 $\epsilon$ (145-2C11) | Biolegend      | 100320        |
| Mouse          | PerCP/Cy5.5          | CD4 (GK1.5)               | Biolegend      | 100433        |
| Mouse          | Brilliant Violet 510 | CD8a (53-6.7)             | Biolegend      | 100752        |
| Mouse          | Purified             | CD16/32 (93)              | Biolegend      | 101302        |
| Mouse          | PE                   | CD21/CD35 (7E9)           | Biolegend      | 123409        |
| Mouse          | PerCP/Cy5.5          | CD21/CD35 (7E9)           | Biolegend      | 123415        |
| Mouse          | Brilliant Violet 510 | CD23 (B3B4)               | Biolegend      | 101623        |
| Mouse          | Brilliant Violet 421 | CD138 (281-2)             | Biolegend      | 142508        |
| Mouse          | PE                   | IgM (RMM-1)               | Biolegend      | 406508        |
| Mouse/ Human   | APC                  | CFSE                      | eBioscience    | 65-0850       |
| Mouse          | APC                  | CD80 (16-10A1)            | Biolegend      | 104714        |
| Mouse          | PE                   | CD86 (GL-1)               | Biolegend      | 105008        |
| Mouse          | PE                   | IgG (Poly4053)            | Biolegend      | 405307        |
| Mouse          | FITC                 | IgG1                      | BD             | 553443        |
| Mouse          | APC                  | IgG2a (RMG2a-62)          | Biolegend      | 407109        |
| Mouse          | FITC                 | IgA                       | BD             | 559354        |
| Mouse          | PE                   | IgE (RME-1)               | Biolegend      | 406907        |
| Mouse          | PE                   | MHCII (M5/114.15.2)       | Biolegend      | 107608        |
| Mouse          | Brilliant Violet 510 | MHCII (M5/114.15.2)       | Biolegend      | 107635        |
| Mouse/ Human   | eFluor450            | Live and Dead             | Invitrogen     | 65-0863-14    |
| Mouse/ Human   | eFluor506            | Live and Dead             | Invitrogen     | 65-0866-14    |
| HUMAN          | PE                   | CD19 (4G7)                | Biolegend      | 392503        |
| HUMAN          | APC                  | CD138(DL-101)             | Biolegend      | 352307        |
| HUMAN          | PE/Cyanine7          | CD3 $\epsilon$ (HIT3a)    | Biolegend      | 300316        |
|                |                      | Fixation/Permeabilization | ThermoFisher   | 00-5521-00    |
